# Supplementary material
Source: bioRxiv or medRxiv preprint supplement (https://www.biorxiv.org/highwire/filestream/90889/field_highwire_adjunct_files/6/295097-7.pdf)

### A) Non Graphical Solutions to Scree Test

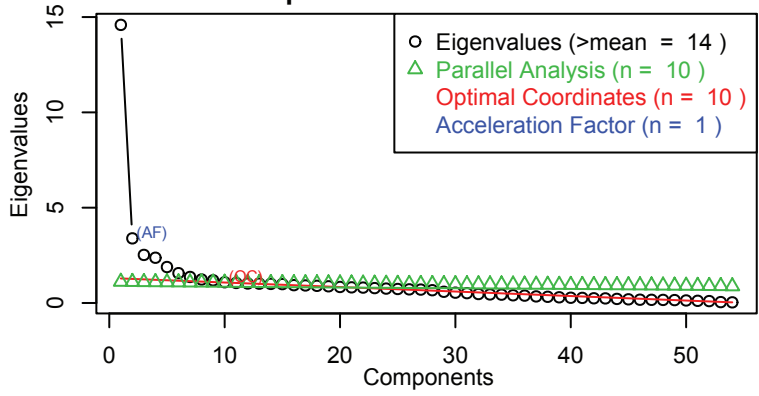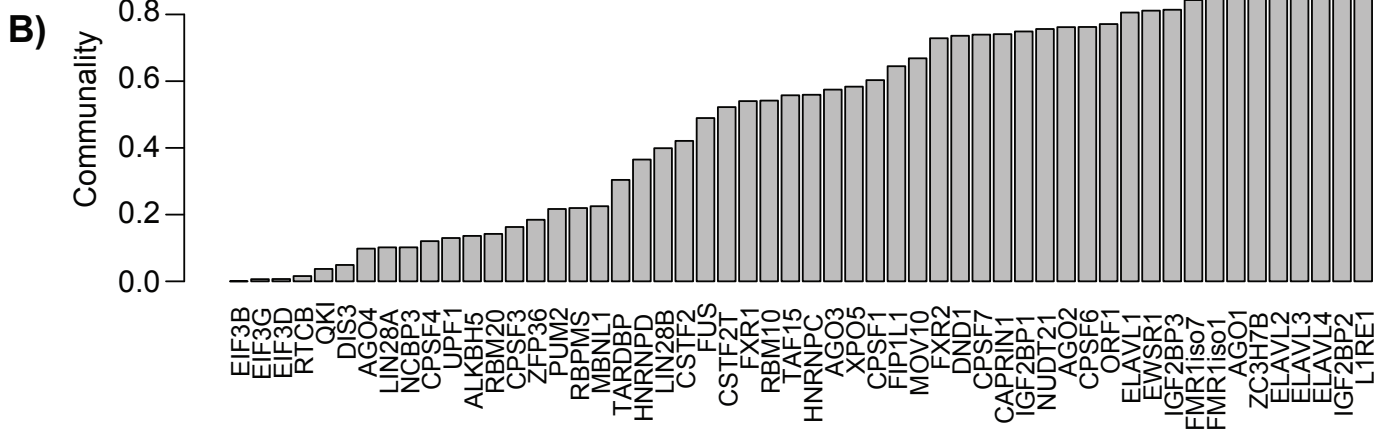

### C)

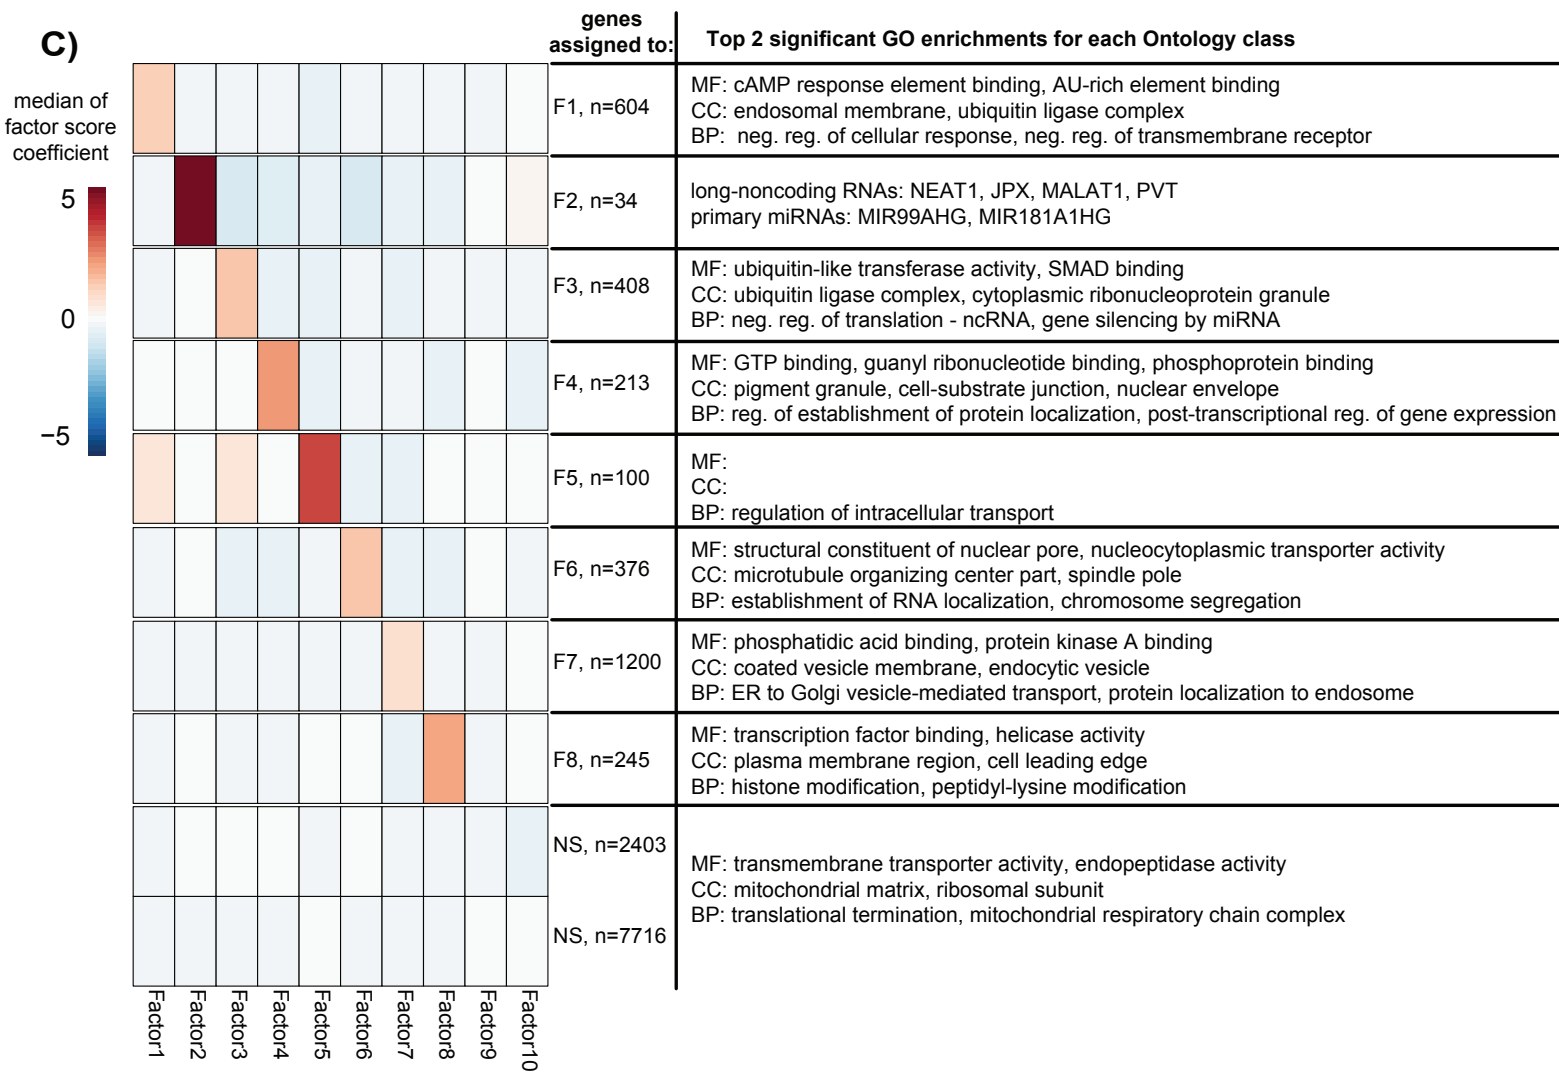

Supplement: Supplementary file [file 295097-7.pdf]
